# Supplementary material
Source: Research Square preprint supplement (doi:10.21203/rs.3.rs-10115621/v1)
Supplement: Supplementary file 1 [file ae47389ec8c0019374dcb519.xlsx]

## Sheet: Table S1
Supplementary Table 1. Basic characteristics of included enterprises and dust-exposed work positions
Characteristic	Category	No.	Percentage (%)
Enterprises	Total	42	100
Enterprise size	Large	1	2.4
Enterprise size	Medium	5	11.9
Enterprise size	Small	25	59.5
Enterprise size	Micro	11	26.2
Registration type	Other joint-stock limited company	20	47.6
Registration type	Private limited liability company	17	40.5
Registration type	Sole proprietorship enterprise	5	11.9
Work positions	Total	231	100
Dust type	Silica dust	213	92.2
Dust type	Welding fumes	18	7.8
Free SiO₂ content among silica dust positions	>50%	72	33.8
Free SiO₂ content among silica dust positions	≤50%	141	66.2
Abbreviations: SiO₂, silicon dioxide.
